# Supplementary material for: Metabolomics of aging assessed in individual parasitoid wasps
Source: PubMed Central journal article supplement (PMC5054366; doi:10.1038/srep34848), 2016-10-07
Supplement: srep34848-s1.pdf [file srep34848-s1.pdf]

## Metabolomics of aging assessed in individual parasitoid wasps

Apostolos Kapranas, Charles J. P. Snart, Huw Williams, Ian C. W. Hardy & David A. Barrett

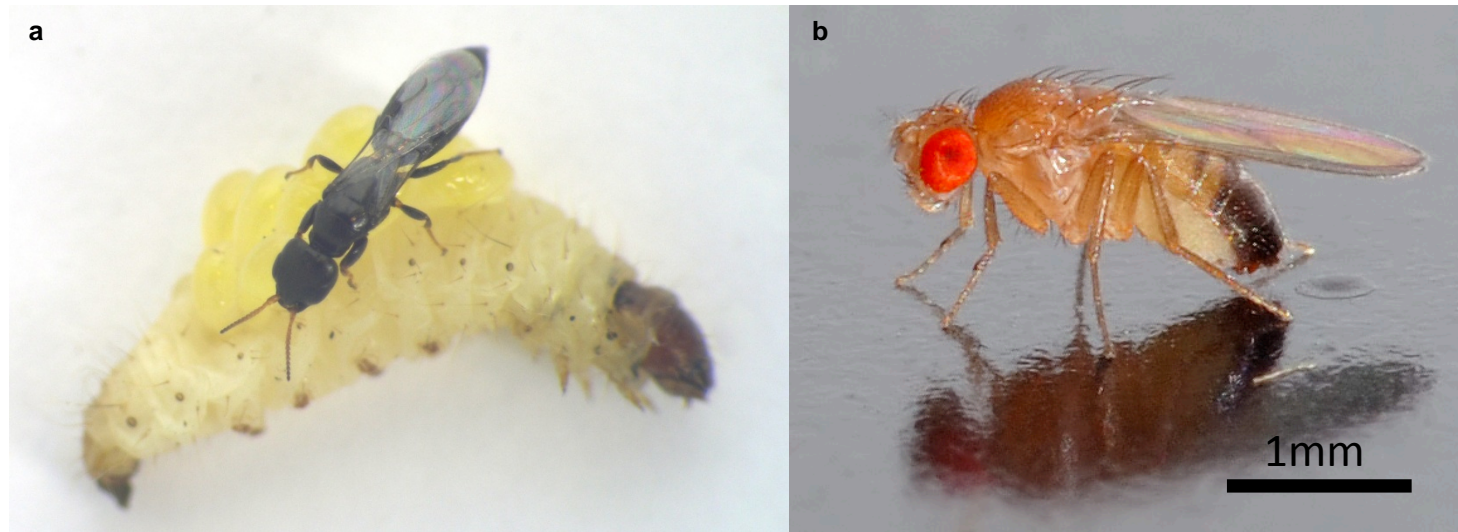

**Supplementary Figure S1.** Comparison of (a) *Goniozus legneri* and (b) *Drosophila melanogaster*. *G. legneri* is of a similar biomass to that of *D. melanogaster* (~1mg) Photos: (a) Sonia Dourlot (b) André Karwath, Wikimedia Commons. Photo is reproduced under the Creative Commons Attribution-Share Alike 2.5 Generic license.:  
<https://creativecommons.org/licenses/by-sa/2.5/deed.en>  
[https://en.wikipedia.org/wiki/Drosophila\\_melanogaster](https://en.wikipedia.org/wiki/Drosophila_melanogaster)  
[https://upload.wikimedia.org/wikipedia/commons/4/4c/Drosophila\\_melanogaster\\_-\\_side\\_\(aka\).jpg](https://upload.wikimedia.org/wikipedia/commons/4/4c/Drosophila_melanogaster_-_side_(aka).jpg)

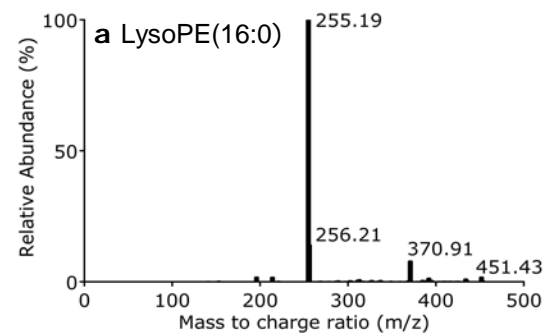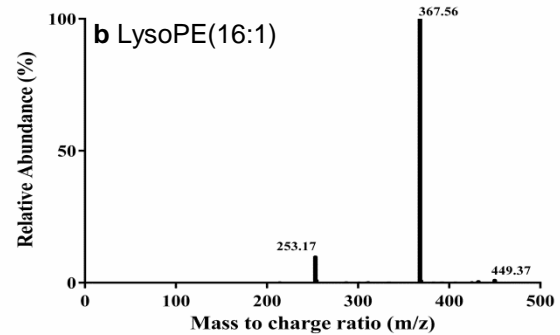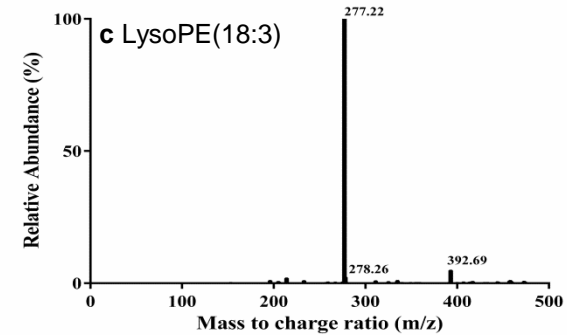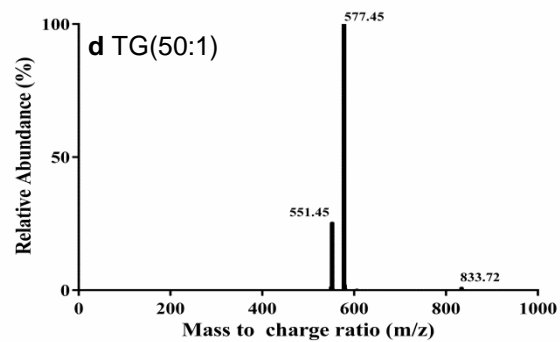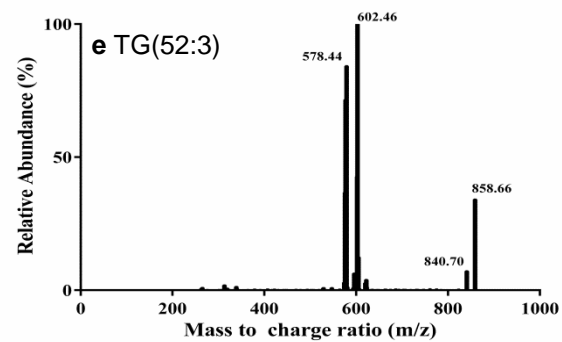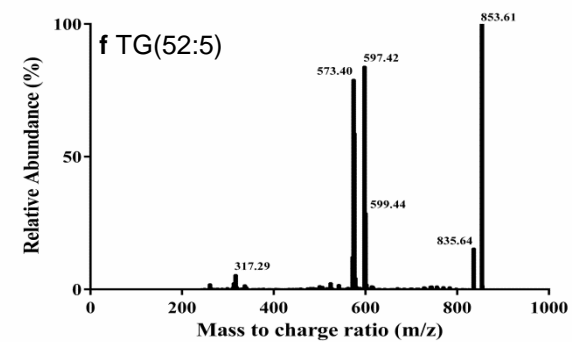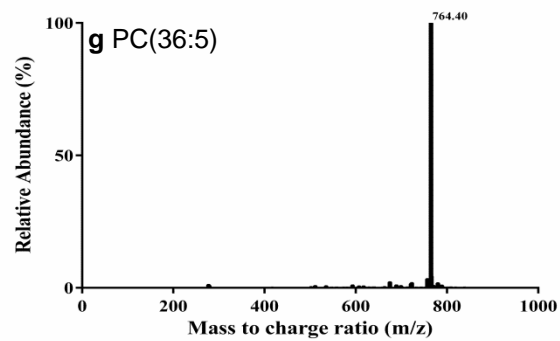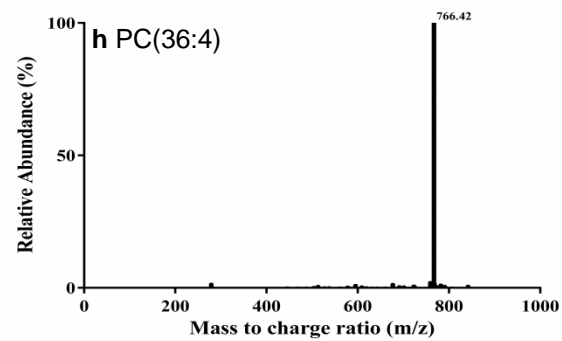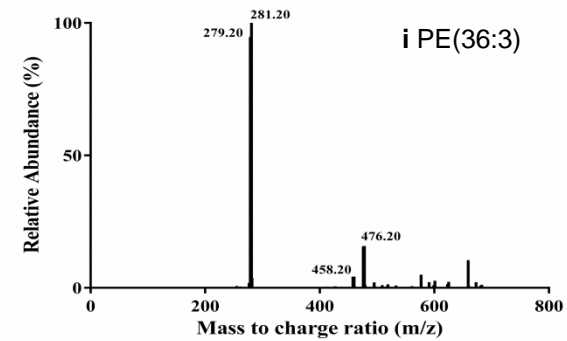

**Supplementary Figure S2.** LC-MS-MS spectra of differential lipid classes (a-c) Lipophospholipids (d-f) Triacylglycerides (g-i) Phospholipids.

**Supplementary Table S1.** Relative standard deviations of key spectral bins for NMR stability replicates (QC = quality control sample).

| Bin Identity (ppm) | Relative Standard Deviation (%) |       |       |
|--------------------|---------------------------------|-------|-------|
|                    | QC1                             | QC2   | QC3   |
| 3.70 (Glucose)     | 3.71                            | 22.62 | 7.86  |
| 8.53 (ATP)         | 27.83                           | 41.58 | 27.15 |
| 3.82 (Trehalose)   | 6.90                            | 23.61 | 14.77 |
| 2.01 (Arginine)    | 11.67                           | 13.76 | 9.17  |
| 3.55 (Glycerol)    | 10.54                           | 5.74  | 2.66  |
| 2.34 (Glutamate)   | 16.62                           | 7.30  | 19.79 |
| 0.99 (Valine)      | 15.85                           | 14.82 | 22.89 |
| 2.01 (Proline)     | 11.67                           | 13.76 | 9.17  |
| 3.59 (Threonine)   | 11.78                           | 5.01  | 4.85  |
| 0.95 (Leucine)     | 12.44                           | 8.05  | 10.48 |

**Supplementary Table S2.** LC-MS key ion peak area RSDs (%) for technical replicates and quality control (QC) samples. RT = retention time, RSD = relative standard deviation. PE = phosphoethanolamine, PC = phosphocholine, PG = phosphoglycerol, DG = diacylglyceride, TG = triacylglyceride.

| <i>M/Z</i> | Average RT (min) | Tentative Identification | Phase    | Adduct            | Formula                                           | Mass error (ppm) | Replicate peak area RSD (%) | Repliate peak area RSD range (%) | QC peak area RSD (%) |
|------------|------------------|--------------------------|----------|-------------------|---------------------------------------------------|------------------|-----------------------------|----------------------------------|----------------------|
| 253.217    | 2.13             | Palmitoleic acid         | Negative | M-H               | C <sub>16</sub> H <sub>30</sub> O <sub>2</sub>    | 0.073            | 5.32                        | 0.58 - 13.73                     | 6.24                 |
| 255.233    | 2.67             | Palmitic acid            | Negative | M-H               | C <sub>16</sub> H <sub>32</sub> O <sub>2</sub>    | 0.03             | 3.88                        | 1.34 - 12.12                     | 26.07                |
| 277.218    | 1.91             | Linolenic Acid           | Negative | M-H               | C <sub>18</sub> H <sub>30</sub> O <sub>2</sub>    | 0.120            | 4.11                        | 0.38 - 16.31                     | 13.74                |
| 281.249    | 2.79             | Oleic Acid               | Negative | M-H               | C <sub>18</sub> H <sub>34</sub> O <sub>2</sub>    | 0.180            | 4.11                        | 0.21 - 25.33                     | 2.39                 |
| 283.264    | 3.35             | Stearic Acid             | Negative | M-H               | C <sub>18</sub> H <sub>36</sub> O <sub>2</sub>    | 0.030            | 9.05                        | 0.75 - 8.87                      | 10.88                |
| 452.277    | 1.57             | LysoPE(16:0)             | Positive | M+H               | C <sub>21</sub> H <sub>44</sub> NO <sub>7</sub> P | 0.189            | 5.16                        | 0.04 - 9.76                      | 3.59                 |
| 474.267    | 0.95             | LysoPE(18:3)             | Positive | M+H               | C <sub>23</sub> H <sub>42</sub> NO <sub>7</sub> P | 5.8              | 4.13                        | 0.50 - 13.58                     | 18.32                |
| 478.293    | 1.72             | LysoPE(18:2)             | Positive | M+H               | C <sub>23</sub> H <sub>44</sub> NO <sub>7</sub> P | 0.2              | 3.33                        | 0.17 - 9.51                      | 2.69                 |
| 480.308    | 2.13             | LysoPE(18:1)             | Positive | M+H               | C <sub>23</sub> H <sub>46</sub> NO <sub>7</sub> P | 0.5              | 3.25                        | 0.35 - 8.31                      | 2.40                 |
| 494.324    | 1.49             | LysoPC(16.1)             | Positive | M+H               | C <sub>24</sub> H <sub>48</sub> NO <sub>7</sub> P | 0.139            | 9.88                        | 0.23 - 8.24                      | 4.45                 |
| 496.342    | 1.95             | LysoPC(16.0)             | Positive | M+H               | C <sub>24</sub> H <sub>50</sub> NO <sub>7</sub> P | 0.1              | 2.87                        | 1.57 - 19.08                     | 3.63                 |
| 610.540    | 5.15             | DG(34:2)                 | Positive | M+NH <sub>4</sub> | C <sub>37</sub> H <sub>68</sub> O <sub>5</sub>    | 0.298            | 4.53                        | 0.56 - 11.84                     | 4.28                 |
| 612.556    | 5.52             | DG(34:1)                 | Positive | M+NH <sub>4</sub> | C <sub>37</sub> H <sub>70</sub> O <sub>5</sub>    | 0.448            | 4.41                        | 0.96 - 10.12                     | 4.08                 |
| 617.511    | 5.51             | DG(36:4)                 | Positive | M+H               | C <sub>39</sub> H <sub>68</sub> O <sub>5</sub>    | 2.975            | 4.21                        | 1.50 - 8.20                      | 8.49                 |
| 641.511    | 5.13             | DG(36:3)                 | Positive | M+Na              | C <sub>39</sub> H <sub>70</sub> O <sub>5</sub>    | 0.743            | 4.35                        | 0.55 - 9.17                      | 7.16                 |
| 643.526    | 5.52             | DG(36:2)                 | Positive | M+Na              | C <sub>39</sub> H <sub>72</sub> O <sub>5</sub>    | 0.993            | 4.92                        | 1.32 - 8.79                      | 9.04                 |
| 712.493    | 4.41             | PE(34:3)                 | Negative | M-H               | C <sub>39</sub> H <sub>72</sub> NO <sub>8</sub> P | 0.645            | 6.36                        | 1.30 - 22.37                     | 3.93                 |
| 736.493    | 4.13             | PE(36:5)                 | Negative | M-H               | C <sub>41</sub> H <sub>72</sub> NO <sub>7</sub> P | 0.845            | 6.47                        | 2.07 - 12.78                     | 4.74                 |
| 738.509    | 4.39             | PE(36:4)                 | Negative | M-H               | C <sub>41</sub> H <sub>74</sub> NO <sub>8</sub> P | 0.695            | 5.14                        | 1.19 - 12.74                     | 4.42                 |
| 740.524    | 4.65             | PE(36:3)                 | Negative | M-H               | C <sub>41</sub> H <sub>76</sub> NO <sub>8</sub> P | 0.245            | 7.36                        | 0.02 - 14.53                     | 5.10                 |
| 742.530    | 5.02             | PE(36:2)                 | Negative | M-H               | C <sub>41</sub> H <sub>78</sub> NO <sub>7</sub> P | 0.980            | 14.41                       | 0.32 - 18.55                     | 76.58                |
| 744.555    | 5.45             | PE(36:1)                 | Negative | M-H               | C <sub>41</sub> H <sub>80</sub> NO <sub>7</sub> P | 0.345            | 5.01                        | 3.51 - 25.37                     | 3.51                 |
| 745.503    | 5.45             | PG(34:2)                 | Negative | M-H               | C <sub>40</sub> H <sub>75</sub> O <sub>10</sub> P | 0.715            | 8.45                        | 0.33 - 11.36                     | 12.17                |
| 748.529    | 4.39             | PE(38:5)                 | Negative | M-H               | C <sub>43</sub> H <sub>76</sub> NO <sub>7</sub> P | 0.260            | 17.73                       | 1.15 - 20.09                     | 5.13                 |
| 794.496    | 5.08             | PE(36:6)                 | Negative | M+Hac-H           | C <sub>41</sub> H <sub>70</sub> NO <sub>8</sub> P | 1.756            | 5.07                        | 2.12 - 34.44                     | 9.88                 |
| 846.753    | 8.71             | TG(50:3)                 | Positive | M+NH <sub>4</sub> | C <sub>54</sub> H <sub>98</sub> O <sub>6</sub>    | 1.214            | 2.04                        | 0.21 - 6.18                      | 5.11                 |
| 849.772    | 5.29             | TG(50:2)                 | Positive | M+NH <sub>4</sub> | C <sub>53</sub> H <sub>98</sub> O <sub>6</sub>    | 2.236            | 3.49                        | 0.81 - 4.62                      | 6.04                 |
| 850.784    | 7.29             | TG(50:1)                 | Positive | M+NH <sub>4</sub> | C <sub>53</sub> H <sub>102</sub> O <sub>5</sub>   | 1.614            | 4.35                        | 1.12 - 7.78                      | 3.73                 |
| 868.738    | 8.71             | TG(52:6)                 | Positive | M+NH <sub>4</sub> | C <sub>55</sub> H <sub>94</sub> O <sub>6</sub>    | 1.364            | 3.78                        | 0.32 - 12.09                     | 4.83                 |
| 870.753    | 7.95             | TG(52:5)                 | Positive | M+NH <sub>4</sub> | C <sub>55</sub> H <sub>98</sub> O <sub>5</sub>    | 1.814            | 3.21                        | 0.38 - 8.47                      | 5.84                 |
| 872.769    | 8.73             | TG(52:4)                 | Positive | M+NH <sub>4</sub> | C <sub>55</sub> H <sub>98</sub> O <sub>6</sub>    | 1.464            | 3.89                        | 0.23 - 7.20                      | 5.04                 |
| 876.781    | 7.09             | TG(52:2)                 | Positive | M+NH <sub>4</sub> | C <sub>55</sub> H <sub>102</sub> O <sub>6</sub>   | 0.564            | 4.53                        | 0.07 - 42.60                     | 39.63                |
| 887.775    | 7.48             | TG(53:4)                 | Positive | M+NH <sub>4</sub> | C <sub>56</sub> H <sub>100</sub> O <sub>6</sub>   | 7.735            | 4.85                        | 0.76 - 7.76                      | 20.99                |
| 894.754    | 8.73             | TG(54:7)                 | Positive | M+NH <sub>4</sub> | C <sub>57</sub> H <sub>98</sub> O <sub>5</sub>    | 0.114            | 4.61                        | 0.77 - 12.20                     | 5.93                 |

**SupplementaryTable S2 cont:** LC-MS key ion retention time RSDs (%) for technical replicates and quality control (QC) samples. RT = retention time, RSD = relative standard deviation. PE = phosphoethanolamine, PC = phosphocholine, PG = phosphoglycerol, DG = diacylglyceride, TG = triacylglyceride.

| <i>M/Z</i> | Average RT (min) | Tentative identification | Phase    | Adduct            | Formula                                           | Mass error (ppm) | RT RSD (%) | RT RSD range (%) | QC RT RSD (%) |
|------------|------------------|--------------------------|----------|-------------------|---------------------------------------------------|------------------|------------|------------------|---------------|
| 253.217    | 2.13             | Palmitoleic acid         | Negative | M-H               | C <sub>16</sub> H <sub>30</sub> O <sub>2</sub>    | 0.073            | 2.43       | 0.44 - 6.43      | 1.89          |
| 255.233    | 2.67             | Palmitic acid            | Negative | M-H               | C <sub>16</sub> H <sub>32</sub> O <sub>2</sub>    | 0.03             | 0.75       | 0.26 - 1.18      | 0.87          |
| 277.218    | 1.91             | Linolenic Acid           | Negative | M-H               | C <sub>18</sub> H <sub>30</sub> O <sub>2</sub>    | 0.120            | 1.03       | 0.15 - 2.26      | 1.66          |
| 281.249    | 2.79             | Oleic Acid               | Negative | M-H               | C <sub>18</sub> H <sub>34</sub> O <sub>2</sub>    | 0.180            | 1.26       | 0.04 - 6.04      | 1.09          |
| 283.264    | 3.35             | Stearic Acid             | Negative | M-H               | C <sub>18</sub> H <sub>36</sub> O <sub>2</sub>    | 0.030            | 0.60       | 0.17 - 1.08      | 0.70          |
| 452.277    | 1.57             | LysoPE(16:0)             | Positive | M+H               | C <sub>21</sub> H <sub>44</sub> NO <sub>7</sub> P | 0.189            | 1.17       | 0.09 - 1.81      | 1.64          |
| 474.267    | 0.95             | LysoPE(18:3)             | Positive | M+H               | C <sub>23</sub> H <sub>42</sub> NO <sub>7</sub> P | 5.8              | 2.01       | 0.14 - 3.75      | 2.96          |
| 478.293    | 1.72             | LysoPE(18:2)             | Positive | M+H               | C <sub>23</sub> H <sub>44</sub> NO <sub>7</sub> P | 0.2              | 1.02       | 0.10 - 1.74      | 1.38          |
| 480.308    | 2.13             | LysoPE(18:1)             | Positive | M+H               | C <sub>23</sub> H <sub>46</sub> NO <sub>7</sub> P | 0.5              | 1.04       | 0.39 - 1.64      | 1.24          |
| 494.324    | 1.49             | LysoPC(16.1)             | Positive | M+H               | C <sub>24</sub> H <sub>48</sub> NO <sub>7</sub> P | 0.139            | 1.24       | 0.42 - 1.81      | 1.67          |
| 496.342    | 1.95             | LysoPC(16.0)             | Positive | M+H               | C <sub>24</sub> H <sub>50</sub> NO <sub>7</sub> P | 0.1              | 1.98       | 0.60 - 3.53      | 2.71          |
| 610.540    | 5.15             | DG(34:2)                 | Positive | M+NH <sub>4</sub> | C <sub>37</sub> H <sub>68</sub> O <sub>5</sub>    | 0.298            | 0.43       | 0.04 - 0.72      | 0.56          |
| 612.556    | 5.52             | DG(34:1)                 | Positive | M+NH <sub>4</sub> | C <sub>37</sub> H <sub>70</sub> O <sub>5</sub>    | 0.448            | 0.44       | 0.06 - 0.76      | 0.50          |
| 617.511    | 5.51             | DG(36:4)                 | Positive | M+H               | C <sub>39</sub> H <sub>68</sub> O <sub>5</sub>    | 2.975            | 0.43       | 0.06 - 0.74      | 0.46          |
| 641.511    | 5.13             | DG(36:3)                 | Positive | M+Na              | C <sub>39</sub> H <sub>70</sub> O <sub>5</sub>    | 0.743            | 0.40       | 0.04 - 0.78      | 0.56          |
| 643.526    | 5.52             | DG(36:2)                 | Positive | M+Na              | C <sub>39</sub> H <sub>72</sub> O <sub>5</sub>    | 0.993            | 0.47       | 0.06 - 0.95      | 0.50          |
| 712.493    | 4.41             | PE(34:3)                 | Negative | M-H               | C <sub>39</sub> H <sub>72</sub> NO <sub>8</sub> P | 0.645            | 1.46       | 0.02 - 2.35      | 2.76          |
| 736.493    | 4.13             | PE(36:5)                 | Negative | M-H               | C <sub>41</sub> H <sub>72</sub> NO <sub>7</sub> P | 0.845            | 0.58       | 0.18 - 0.99      | 0.96          |
| 738.509    | 4.39             | PE(36:4)                 | Negative | M-H               | C <sub>41</sub> H <sub>74</sub> NO <sub>8</sub> P | 0.695            | 0.95       | 0.26 - 1.64      | 1.64          |
| 740.524    | 4.65             | PE(36:3)                 | Negative | M-H               | C <sub>41</sub> H <sub>76</sub> NO <sub>8</sub> P | 0.245            | 0.65       | 0.03 - 2.37      | 2.41          |
| 742.530    | 5.02             | PE(36:2)                 | Negative | M-H               | C <sub>41</sub> H <sub>78</sub> NO <sub>7</sub> P | 0.980            | 1.15       | 0.13 - 3.98      | 4.52          |
| 744.555    | 5.45             | PE(36:1)                 | Negative | M-H               | C <sub>41</sub> H <sub>80</sub> NO <sub>7</sub> P | 0.345            | 1.14       | 0.20 - 2.05      | 2.04          |
| 745.503    | 5.45             | PG(34:2)                 | Negative | M-H               | C <sub>40</sub> H <sub>75</sub> O <sub>10</sub> P | 0.715            | 0.40       | 0.18 - 0.85      | 0.39          |
| 748.529    | 4.39             | PE(38:5)                 | Negative | M-H               | C <sub>43</sub> H <sub>76</sub> NO <sub>7</sub> P | 0.260            | 1.38       | 0.12 - 2.09      | 1.65          |
| 794.496    | 5.08             | PE(36:6)                 | Negative | M+Hac-H           | C <sub>41</sub> H <sub>70</sub> NO <sub>8</sub> P | 1.756            | 1.04       | 0.10 - 2.17      | 1.87          |
| 846.753    | 8.71             | TG(50:3)                 | Positive | M+NH <sub>4</sub> | C <sub>54</sub> H <sub>98</sub> O <sub>6</sub>    | 1.214            | 0.49       | 0.18 - 0.97      | 1.00          |
| 849.772    | 5.29             | TG(50:2)                 | Positive | M+NH <sub>4</sub> | C <sub>53</sub> H <sub>98</sub> O <sub>6</sub>    | 2.236            | 0.61       | 0.10 - 1.12      | 0.93          |
| 850.784    | 7.29             | TG(50:1)                 | Positive | M+NH <sub>4</sub> | C <sub>53</sub> H <sub>102</sub> O <sub>5</sub>   | 1.614            | 0.49       | 0.06 - 0.72      | 1.08          |
| 868.738    | 8.71             | TG(52:6)                 | Positive | M+NH <sub>4</sub> | C <sub>55</sub> H <sub>94</sub> O <sub>6</sub>    | 1.364            | 0.52       | 0.10 - 0.83      | 0.76          |
| 870.753    | 7.95             | TG(52:5)                 | Positive | M+NH <sub>4</sub> | C <sub>55</sub> H <sub>98</sub> O <sub>5</sub>    | 1.814            | 0.57       | 0.14 - 0.99      | 0.87          |
| 872.769    | 8.73             | TG(52:4)                 | Positive | M+NH <sub>4</sub> | C <sub>55</sub> H <sub>98</sub> O <sub>6</sub>    | 1.464            | 0.43       | 0.18 - 0.85      | 0.98          |
| 876.781    | 7.09             | TG(52:2)                 | Positive | M+NH <sub>4</sub> | C <sub>55</sub> H <sub>102</sub> O <sub>6</sub>   | 0.564            | 0.55       | 0.13 - 1.08      | 0.96          |
| 887.775    | 7.48             | TG(52:0)                 | Positive | M+NH <sub>4</sub> | C <sub>56</sub> H <sub>100</sub> O <sub>6</sub>   | 7.735            | 0.46       | 0.15 - 0.82      | 0.82          |
| 253.217    | 8.73             | TG(54:7)                 | Positive | M+NH <sub>4</sub> | C <sub>57</sub> H <sub>98</sub> O <sub>5</sub>    | 0.114            | 0.46       | 0.05 - 0.75      | 0.75          |

**Supplementary Table 3:** Summary of 59 non-polar biomarkers with tentative identities that significantly differ between 0 day old and 7 day old wasp extracts. PE = phosphoethanolamine, PC = phosphocholine. Fold changes were detected with **Kruskal-Wallis tests (non-parametric)**. Negative and positive fold changes indicate metabolites that declined and increased respectively in abundance between 0 day old and 7 day old wasps

| <i>M/Z</i> | Average RT (min) | Adduct    | ESI Phase | Common Name              | Formula                                           | d.f. | <i>H</i> value | P value | Fold change | Mass error (ppm) |
|------------|------------------|-----------|-----------|--------------------------|---------------------------------------------------|------|----------------|---------|-------------|------------------|
| 253.217    | 2.14             | M-H       | Negative  | Palmitoleic acid         | C <sub>16</sub> H <sub>30</sub> O <sub>2</sub>    | 2    | 26.79          | <0.01   | -2.32       | 0.304            |
| 277.218    | 1.41             | M-H       | Negative  | Linolenic Acid           | C <sub>18</sub> H <sub>30</sub> O <sub>2</sub>    | 2    | 31.65          | <0.01   | -4.77       | 0.696            |
| 281.249    | 2.13             | M-H       | Negative  | Oleic Acid               | C <sub>18</sub> H <sub>34</sub> O <sub>2</sub>    | 2    | 17.86          | <0.01   | -4.09       | 0.396            |
| 450.263    | 1.62             | M-H       | Negative  | LysoPE(16:1/0:0)         | C <sub>21</sub> H <sub>42</sub> NO <sub>7</sub> P | 2    | 30.46          | <0.01   | -10.13      | 0.387            |
| 452.277    | 1.58             | M+H       | Positive  | LysoPE(0:0/16:0)         | C <sub>21</sub> H <sub>44</sub> NO <sub>7</sub> P | 2    | 35.43          | <0.01   | -6.08       | 0.737            |
| 452.279    | 2.05             | M-H       | Negative  | LysoPE(16:0/0:0)         | C <sub>21</sub> H <sub>44</sub> NO <sub>7</sub> P | 2    | 34.62          | <0.01   | -3.76       | 0.737            |
| 474.263    | 1.44             | M-H       | Negative  | LysoPE(18:3/0:0)         | C <sub>23</sub> H <sub>42</sub> NO <sub>7</sub> P | 2    | 35.79          | <0.01   | -4.69       | 0.387            |
| 476.277    | 1.43             | M+H, M+NA | Positive  | LysoPE(0:0/18:3)         | C <sub>23</sub> H <sub>42</sub> NO <sub>7</sub> P | 2    | 31.34          | <0.01   | -3.77       | 1.263            |
| 476.279    | 1.74             | M-H       | Negative  | LysoPE(18:2(9Z,12Z)/0:0) | C <sub>23</sub> H <sub>44</sub> NO <sub>7</sub> P | 2    | 29.86          | <0.01   | -4.44       | 0.737            |
| 478.293    | 1.75             | M+H, M+NA | Positive  | LysoPE(0:0/18:2)         | C <sub>23</sub> H <sub>44</sub> NO <sub>7</sub> P | 2    | 30.38          | <0.01   | -3.25       | 0.087            |
| 478.294    | 2.13             | M-H       | Negative  | LysoPE(18:1(9Z)/0:0)     | C <sub>23</sub> H <sub>46</sub> NO <sub>7</sub> P | 2    | 28.94          | <0.01   | -4.05       | 0.087            |
| 480.308    | 2.17             | M+H, M+NA | Positive  | LysoPE(0:0/18:1)         | C <sub>23</sub> H <sub>46</sub> NO <sub>7</sub> P | 2    | 29.73          | <0.01   | -3.10       | 0.465            |
| 494.324    | 1.50             | M+H, M+NA | Positive  | LysoPC(0.0/16.1)         | C <sub>24</sub> H <sub>48</sub> NO <sub>7</sub> P | 2    | 27.73          | <0.01   | -5.98       | 0.115            |
| 496.34     | 1.96             | M+H, M+NA | Positive  | LysoPC(0.0/16.0)         | C <sub>24</sub> H <sub>50</sub> NO <sub>7</sub> P | 2    | 34.56          | <0.01   | -2.99       | 0.235            |
| 506.325    | 2.05             | M-H       | Negative  | LysoPE(20:1(11Z)/0:0)    | C <sub>25</sub> H <sub>50</sub> NO <sub>7</sub> P | 2    | 27.25          | <0.01   | -3.72       | 0.213            |
| 520.339    | 1.35             | M+H, M+NA | Positive  | LysoPC(0:0/18:2)         | C <sub>26</sub> H <sub>50</sub> NO <sub>7</sub> P | 2    | 31.57          | <0.01   | -3.67       | 0.765            |
| 522.355    | 2.09             | M+H, M+NA | Positive  | LysoPC(0:0/18:1)         | C <sub>26</sub> H <sub>52</sub> NO <sub>7</sub> P | 2    | 29.85          | <0.01   | -3.73       | 0.416            |
| 540.305    | 1.35             | M+Na      | Positive  | LysoPC(0:0/18:3)         | C <sub>26</sub> H <sub>48</sub> NO <sub>7</sub> P | 2    | 31.67          | <0.01   | -4.26       | 1.057            |
| 546.352    | 2.64             | M+Na      | Positive  | LysoPC(0:0/18:0)         | C <sub>26</sub> H <sub>54</sub> NO <sub>7</sub> P | 2    | 29.62          | <0.05   | -1.79       | 1.008            |
| 580.363    | 2.04             | M-Hac-H   | Negative  | LysoPC(18:1)             | C <sub>26</sub> H <sub>52</sub> NO <sub>7</sub> P | 2    | 20.12          | <0.01   | -3.88       | 1.009            |
| 682.448    | 6.16             | M+Na      | Positive  | PE(30:2)                 | C <sub>35</sub> H <sub>66</sub> NO <sub>8</sub> P | 2    | 31.57          | <0.01   | 6.78        | 0.8              |
| 712.494    | 4.38             | M-H       | Negative  | PE(34:3)                 | C <sub>39</sub> H <sub>72</sub> NO <sub>8</sub> P | 2    | 41.00          | <0.01   | 4.12        | 1.721            |
| 716.525    | 5.03             | M-H       | Negative  | PE(34:1)                 | C <sub>39</sub> H <sub>76</sub> NO <sub>8</sub> P | 2    | 25.61          | <0.01   | 4.39        | 1.421            |
| 736.493    | 4.13             | M-H       | Negative  | PE(36:5)                 | C <sub>41</sub> H <sub>72</sub> NO <sub>7</sub> P | 2    | 25.10          | <0.01   | 6.01        | 0.721            |
| 738.509    | 4.38             | M-H       | Negative  | PE(36:4)                 | C <sub>41</sub> H <sub>74</sub> NO <sub>8</sub> P | 2    | 20.74          | <0.05   | 6.74        | 1.071            |

**Supplementary Table 3. Cont.** Summary of non-polar biomarkers with tentative identities that significantly differ between 0 day old and 7 day old wasp extracts. PE = phosphoethanolamine, PC = phosphocholine, TG = triacylglyceride.

| <i>M/Z</i> | Average RT (min) | Adduct    | ESI Phase | Common Name              | Formula                                           | d.f. | <i>H</i> value | P value | Fold change | Mass error (ppm) |
|------------|------------------|-----------|-----------|--------------------------|---------------------------------------------------|------|----------------|---------|-------------|------------------|
| 740.521    | 4.32             | M+H       | Positive  | PE(36:4)                 | C <sub>41</sub> H <sub>74</sub> NO <sub>8</sub> P | 2    | 34.98          | <0.01   | 6.59        | 0.171            |
| 740.525    | 4.68             | M-H       | Negative  | PE(36:3)                 | C <sub>41</sub> H <sub>76</sub> NO <sub>8</sub> P | 2    | 32.80          | <0.01   | 5.58        | 1.421            |
| 742.526    | 4.38             | M-H       | Negative  | PE(36:2)                 | C <sub>41</sub> H <sub>78</sub> NO <sub>7</sub> P | 2    | 30.53          | <0.01   | 4.92        | 3.3              |
| 744.555    | 5.15             | M-H       | Negative  | PE(36:1)                 | C <sub>41</sub> H <sub>80</sub> NO <sub>7</sub> P | 2    | 29.04          | <0.01   | 5.58        | 0.121            |
| 762.503    | 4.32             | M+Na      | Positive  | PE(36:4)                 | C <sub>41</sub> H <sub>74</sub> NO <sub>8</sub> P | 2    | 35.60          | <0.01   | 5.12        | 0.985            |
| 762.509    | 4.31             | M-Hac-H   | Negative  | PC(30:1)                 | C <sub>38</sub> H <sub>74</sub> NO <sub>8</sub> P | 2    | 31.37          | <0.01   | 6.85        | 3.479            |
| 766.535    | 4.88             | M+Na      | Positive  | PE(36:2)                 | C <sub>41</sub> H <sub>78</sub> NO <sub>7</sub> P | 2    | 29.73          | <0.01   | 5.50        | 0.723            |
| 782.568    | 4.32             | M+H       | Positive  | PC(34:1)                 | C <sub>42</sub> H <sub>82</sub> NO <sub>8</sub> P | 2    | 32.55          | <0.01   | 6.44        | 0.977            |
| 792.707    | 7.83             | M+NH4     | Positive  | TG(42:2(12:0/18.1/16.1)) | C <sub>45</sub> H <sub>82</sub> O <sub>6</sub>    | 2    | 41.44          | <0.01   | -5.73       | 0.564            |
| 794.722    | 8.76             | M+H, M+NA | Positive  | TG(46:1(14:0/16.0/16.1)) | C <sub>49</sub> H <sub>94</sub> O <sub>5</sub>    | 2    | 39.19          | <0.01   | -5.13       | 1.214            |
| 800.494    | 5.01             | M-HCOO    | Negative  | PC(35:5)                 | C <sub>43</sub> H <sub>76</sub> NO <sub>8</sub> P | 2    | 29.52          | <0.01   | 5.45        | 2                |
| 806.566    | 4.66             | M+Na      | Positive  | PC(36:3)                 | C <sub>44</sub> H <sub>82</sub> NO <sub>8</sub> P | 2    | 28.97          | <0.01   | 5.29        | 1.023            |
| 816.480    | 4.85             | M-Hac-H   | Negative  | PC(34:2)                 | C <sub>42</sub> H <sub>80</sub> NO <sub>8</sub> P | 2    | 32.36          | <0.01   | 6.31        | 1.994            |
| 818.496    | 4.13             | M-Hac-H   | Negative  | PC(34:1)                 | C <sub>42</sub> H <sub>82</sub> NO <sub>8</sub> P | 2    | 33.07          | <0.01   | 6.34        | 1.756            |
| 818.721    | 7.68             | M+NH4     | Positive  | TG(48:3(14:1/16.1/18.1)) | C <sub>51</sub> H <sub>92</sub> O <sub>6</sub>    | 2    | 22.20          | <0.01   | -5.51       | 2.214            |
| 820.738    | 8.90             | M+H, M+NA | Positive  | TG(48:2(16:0/16.1/16.1)) | C <sub>51</sub> H <sub>94</sub> O <sub>6</sub>    | 2    | 40.41          | <0.01   | -5.63       | 0.864            |
| 836.547    | 3.86             | M-Hac-H   | Negative  | PC(36:6)                 | C <sub>44</sub> H <sub>76</sub> NO <sub>8</sub> P | 2    | 33.60          | <0.01   | 5.52        | 2.294            |
| 838.561    | 4.09             | M-Hac-H   | Negative  | PC(36:5)                 | C <sub>44</sub> H <sub>78</sub> NO <sub>7</sub> P | 2    | 32.19          | <0.01   | 6.35        | 0.644            |
| 840.576    | 4.38             | M-Hac-H   | Negative  | PC(36:4)                 | C <sub>44</sub> H <sub>80</sub> NO <sub>7</sub> P | 2    | 33.16          | <0.01   | 6.74        | 0.006            |
| 842.592    | 4.73             | M-Hac-H   | Negative  | PC(36:3)                 | C <sub>44</sub> H <sub>82</sub> NO <sub>8</sub> P | 2    | 28.04          | <0.01   | 5.58        | 0.344            |
| 844.608    | 5.12             | M-Hac-H   | Negative  | PC(36:2)                 | C <sub>44</sub> H <sub>84</sub> NO <sub>7</sub> P | 2    | 23.88          | <0.01   | 4.92        | 0.694            |
| 844.738    | 7.90             | M+NH4     | Positive  | TG(50:4(16:0/16.1/18.3)) | C <sub>53</sub> H <sub>96</sub> O <sub>5</sub>    | 2    | 38.61          | <0.01   | -6.56       | 0.864            |
| 846.624    | 5.99             | M-Hac-H   | Negative  | PC(36:1)                 | C <sub>44</sub> H <sub>86</sub> NO <sub>8</sub> P | 2    | 28.39          | <0.01   | 5.59        | 1.044            |
| 846.753    | 8.71             | M+H, M+NA | Positive  | TG(50:3(16:0/16.1/18.2)) | C <sub>54</sub> H <sub>98</sub> O <sub>6</sub>    | 2    | 42.76          | <0.01   | -5.99       | 1.514            |

**Supplementary Table 3. Cont.** Summary of non-polar biomarkers with tentative identities that significantly differ between 0 day old and 7 day old wasp extracts. TG = triacylglyceride.

| <i>M/Z</i> | Average RT (min) | Adduct    | ESI Phase | Common Name              | Formula                                         | d.f. | <i>H</i> value | P value (B) | Fold change | Mass error (ppm) |
|------------|------------------|-----------|-----------|--------------------------|-------------------------------------------------|------|----------------|-------------|-------------|------------------|
| 849.694    | 7.90             | M+NH4     | Positive  | TG(50:2(16:0/16.1/18.1)) | C <sub>53</sub> H <sub>98</sub> O <sub>6</sub>  | 2    | 37.80          | <0.01       | -4.47       | 0.259            |
| 868.738    | 7.22             | M+NH4     | Positive  | TG(52:6(16:1/18.2/18.3)) | C <sub>55</sub> H <sub>94</sub> O <sub>6</sub>  | 2    | 27.62          | <0.01       | -18.77      | 0.864            |
| 870.753    | 7.90             | M+NH4     | Positive  | TG(52:5(16:0/18.2/18.3)) | C <sub>55</sub> H <sub>98</sub> O <sub>5</sub>  | 2    | 35.56          | <0.01       | -6.05       | 0.894            |
| 872.769    | 8.74             | M+H, M+NA | Positive  | TG(52:4(16:0/18.2/18.2)) | C <sub>55</sub> H <sub>98</sub> O <sub>6</sub>  | 2    | 39.42          | <0.01       | -6.13       | 1.164            |
| 875.709    | 7.93             | M+NH4     | Positive  | TG(52:3(16:0/18.1/18.2)) | C <sub>55</sub> H <sub>100</sub> O <sub>6</sub> | 2    | 36.55          | <0.01       | -4.76       | 0.909            |
| 876.799    | 8.67             | M+NH4     | Positive  | TG(52:2(16:0/18.1/18.1)) | C <sub>55</sub> H <sub>102</sub> O <sub>6</sub> | 2    | 31.34          | <0.01       | -7.43       | 2.464            |
| 894.754    | 7.15             | M+NH4     | Positive  | TG(54:7(18:2/18.2/18.3)) | C <sub>57</sub> H <sub>98</sub> O <sub>5</sub>  | 2    | 30.19          | <0.01       | -5.19       | 0.514            |
| 896.775    | 8.09             | M+NH4     | Positive  | TG(54:6(18:1/18.2/18.3)) | C <sub>57</sub> H <sub>100</sub> O <sub>5</sub> | 2    | 29.67          | <0.01       | -3.33       | 4.836            |
| 898.784    | 8.63             | M+H, M+NA | Positive  | TG(54:5(18:1/18.2/18.2)) | C <sub>58</sub> H <sub>104</sub> O <sub>5</sub> | 2    | 27.09          | <0.01       | -4.52       | 0.594            |
| 901.725    | 7.78             | M+NH4     | Positive  | TG(54:4(18:1/18.1/18.2)) | C <sub>57</sub> H <sub>102</sub> O <sub>6</sub> | 2    | 24.17          | <0.01       | -3.98       | 0.559            |
